# Supplementary material
Source: MDPI journal article supplement (https://www.mdpi.com/2073-4441/16/7/935)
Supplement: s1 [file s1]

# **Bacterial communities in *Zostera marina* seagrass beds of Northern China**

**Yong Zhang<sup>1</sup>, Qiuzhen Wang<sup>2</sup>, Yuan Yao<sup>1</sup>, Faqi Tan<sup>1</sup>, Lin Jiang<sup>1</sup>, Weijie Shi<sup>1</sup>, Wen Yang<sup>1</sup>, Jiayi Liu<sup>2</sup>**

<sup>1</sup> Qinhuangdao Ocean Center, Ministry of Natural Resources, Qinhuangdao 066002, China;

<sup>2</sup> Ocean College, Hebei Agricultural University, Qinhuangdao 066000, China

\* Corresponding Author: qqzz1990@163.com

## ***Supplementary Material***

**Supplementary Table S1** Sample information

| No. | Sample | Station | Longitude(°N) | Latitude (°E) | Sample type  |
|-----|--------|---------|---------------|---------------|--------------|
| 1   | L1     | St1     | 118.6901      | 39.09954      | Leave        |
| 2   | R1     | St1     | 118.6901      | 39.09954      | Root         |
| 3   | S1     | St1     | 118.6901      | 39.09954      | Sediment     |
| 4   | W1     | St1     | 118.6901      | 39.09954      | Seawater     |
| 5   | S2     | St2     | 118.7353      | 39.1053       | Sediment     |
| 6   | W2     | St2     | 118.7353      | 39.1053       | Seawater     |
| 7   | L3     | St3     | 118.7171      | 39.03596      | Leave        |
| 8   | L3F    | St3     | 118.7171      | 39.03596      | Leaf surface |
| 9   | R3     | St3     | 118.7171      | 39.03596      | Root         |
| 10  | S3     | St3     | 118.7171      | 39.03596      | Sediment     |
| 11  | W3     | St3     | 118.7171      | 39.03596      | Seawater     |
| 12  | L4     | St4     | 118.6998      | 39.03566      | Leave        |
| 13  | R4     | St4     | 118.6998      | 39.03566      | Root         |
| 14  | S4     | St4     | 118.6998      | 39.03566      | Sediment     |
| 15  | W4     | St4     | 118.6998      | 39.03566      | Seawater     |
| 16  | W5     | St5     | 118.6998      | 39.03566      | Seawater     |

**Supplementary Table S2** Alpha diversity

| Sample | observed_OTUs | Shannon | Simpson | Chao1   | Goods_coverage | Pielou_e |
|--------|---------------|---------|---------|---------|----------------|----------|
| L1     | 1957          | 8.43    | 0.98    | 1959.87 | 1.00           | 0.77     |
| L3     | 1387          | 8.31    | 0.99    | 1387.00 | 1.00           | 0.80     |
| L3F    | 713           | 7.14    | 0.98    | 713.00  | 1.00           | 0.75     |
| L4     | 1102          | 7.69    | 0.99    | 1103.84 | 1.00           | 0.76     |
| R1     | 1345          | 7.70    | 0.97    | 1345.94 | 1.00           | 0.74     |
| R3     | 1296          | 7.84    | 0.98    | 1299.62 | 1.00           | 0.76     |
| R4     | 1338          | 8.28    | 0.99    | 1341.49 | 1.00           | 0.80     |
| S1     | 198           | 4.30    | 0.87    | 198.00  | 1.00           | 0.56     |
| S2     | 190           | 4.19    | 0.87    | 191.00  | 1.00           | 0.55     |
| S3     | 280           | 4.58    | 0.87    | 280.27  | 1.00           | 0.56     |
| S4     | 201           | 4.44    | 0.87    | 201.00  | 1.00           | 0.58     |
| W1     | 881           | 6.94    | 0.98    | 886.29  | 1.00           | 0.71     |
| W2     | 853           | 7.06    | 0.98    | 857.39  | 1.00           | 0.72     |
| W3     | 964           | 7.05    | 0.98    | 965.26  | 1.00           | 0.71     |
| W4     | 881           | 6.98    | 0.97    | 884.83  | 1.00           | 0.71     |
| W5     | 1042          | 7.54    | 0.98    | 1044.06 | 1.00           | 0.75     |

**Supplementary Table S3** Physical and chemical parameters of seawater samples

| Sample                     | W1     | W2      | W3     | W4     |
|----------------------------|--------|---------|--------|--------|
| Depth (m)                  | 1.2    | 0.8     | 2.0    | 0.6    |
| Temperature (°C)           | 22.6   | 22.6    | 22.6   | 22.6   |
| Transparency (m)           | 0.5    | 0.4     | 0.5    | 0.5    |
| Suspended substance (mg/L) | 2.3    | 16.1    | 7.8    | 5.6    |
| Salinity                   | 29.762 | 29.281  | 29.930 | 30.128 |
| DO (mg/L)                  | 6.72   | 7.80    | 9.00   | 7.55   |
| Active phosphate (mg/L)    | 3.820  | 4.950   | 4.670  | 3.990  |
| Nitrite (mg/L)             | 31.500 | 31.400  | 39.600 | 30.600 |
| Nitrate (mg/L)             | 72.800 | 80.100  | 53.800 | 76.000 |
| Ammonium (mg/L)            | 86.700 | 108.000 | 40.700 | 80.200 |
| Petroleum (mg/L)           | 25.700 | 21.500  | 19.500 | 24.300 |

**Supplementary Table S4** Significant correlations ( $P < 0.05$ ) between the top 30 bacterial class in abundance and environmental factors.

| Bacteria         | Salinity | DO     | Nitrite | Nitrate |
|------------------|----------|--------|---------|---------|
| Parcubacteria    | 0.225    | 0.990* | 0.812   | -0.710  |
| Anaerolineae     | 0.277    | 0.855  | 0.998*  | -0.972* |
| Desulfovibrionia | 0.285    | 0.872  | 0.995*  | -0.967* |
| Moduliflexia     | -0.964*  | -0.363 | -0.454  | 0.627   |

Note: \* indicates a significant correlation ( $p < 0.05$ ).

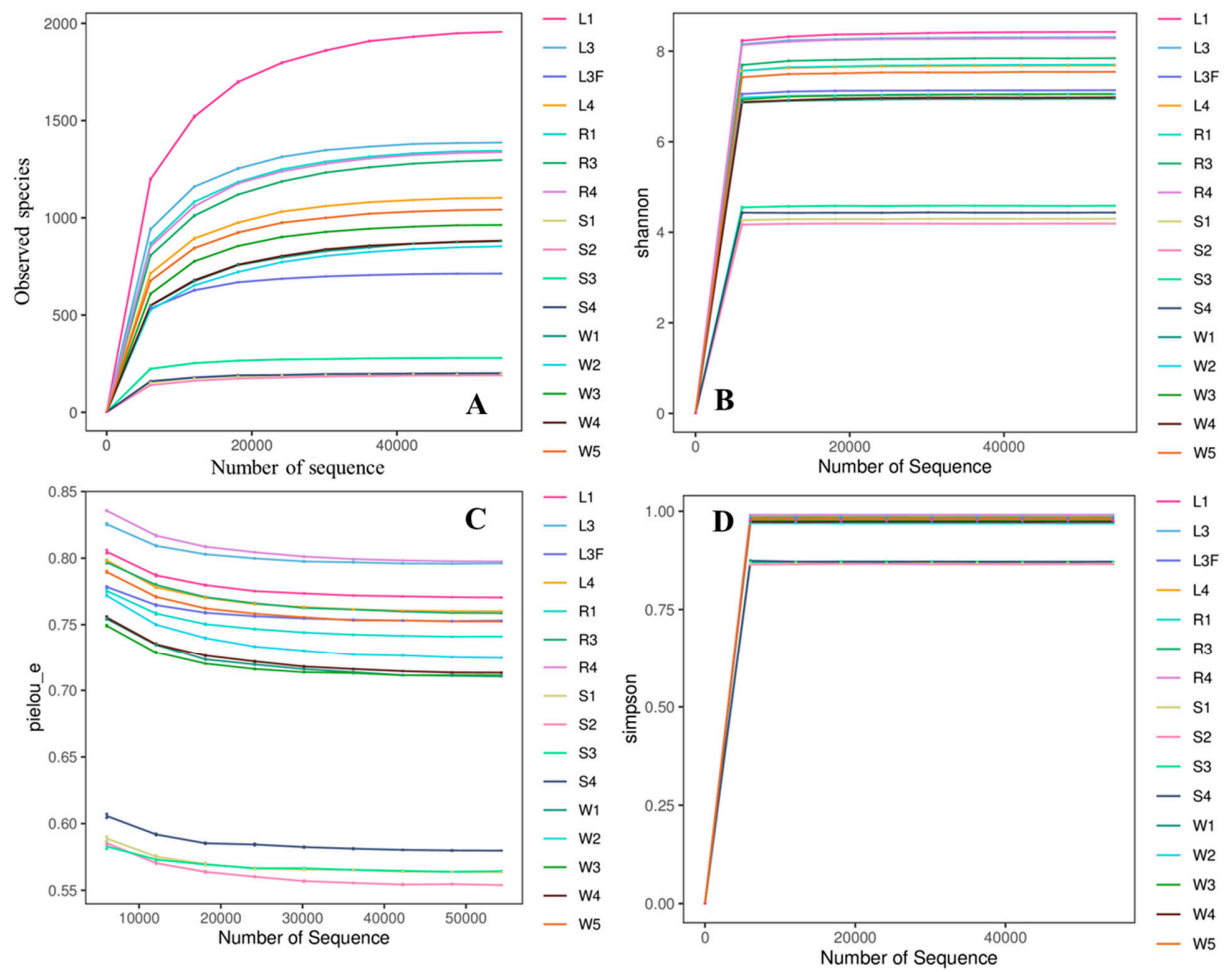

Supplementary Figure S1 Rarefaction curves. The variation of observed species (A), Shannon index (B), Pielou's evenness index (C), and Simpson index (D) with increased number of sequences.
